# Supplementary material
Source: HighWire-hosted journal article supplement (https://injuryprevention.bmj.com/content/27/5/442)
Supplement: inline-supplementary-material-1 [file inline-supplementary-material-1.pdf]

Supplementary Table 1. Contributory drug concentration table used to interpret forensic toxicological analyses and reports

| Class of drugs  | Drug name                | Toxic/lethal range | Range to impact decision/ Drowning                              | Reference |
|-----------------|--------------------------|--------------------|-----------------------------------------------------------------|-----------|
| Cannabinoids    | Cannabis/THC             |                    | 0.0021 mg/L (often report in ng/mL or ug/L: 2.1 ng/mL 2.1 ug/L) | [1, 2]    |
| Benzodiazepines |                          |                    | Therapeutic or above                                            | [2-4]     |
|                 | Alprazolam               | 0.1 – 0.4 mg/L     | 0.005 – 0.05 mg/L                                               | [3]       |
|                 | Bromazepam + OH-         | 0.3 – 0.4 mg/L     | 0.08 – 0.2 mg/L                                                 | [4]       |
|                 | Chlordiazepoxide         | 3.5 – 10 mg/L      | 0.4 – 3 mg/L                                                    | [4]       |
|                 | Norchlordiazepoxide      |                    | 0.3 – 2 mg/L                                                    | [3]       |
|                 | Demoxepam                |                    | 0.5 – 0.74 mg/L                                                 | [3]       |
|                 | Clobazam                 | 0.5                | 0.03 – 0.3 mg/L                                                 | [4]       |
|                 | Norclobazam              |                    | 2.0 – 4.0 mg/L                                                  | [3]       |
|                 | Clonazepam               | 0.1 mg/L           | 0.02 – 0.08 mg/L                                                | [4]       |
|                 | Aminoclonazepam          |                    | 0.02 – 0.07 mg/L                                                | [3]       |
|                 | Desalkylflurazepam       |                    | 0.01 – 0.15 mg/L                                                | [3]       |
|                 | OH-ethylflurazepam       |                    | 0.01 – 0.07 mg/L                                                | [3]       |
|                 | Lorazepam                | 0.3-0.5 mg/L       | 0.02 – 0.25 mg/L                                                | [4]       |
|                 | Lormetazepam             |                    | 0.00-0.02                                                       | [4]       |
|                 | Midazolam + OH-midazolam | 1 – 1.5 mg/L       | 0.04 – 0.1 mg/L                                                 | [4]       |
|                 | Nitrazepam               | 0.2-3 mg/L         | 0.03 – 0.1 mg/L                                                 | [4]       |
|                 | Oxazepam                 |                    | 0.2 -1.5 mg/L                                                   | [4]       |
|                 | Temazepam                | > 1 mg/L           | 0.02 – 0.15mg/L                                                 | [4]       |
|                 | Diazepam                 | 3-5 mg/L           | 0.1-2 mg/L                                                      | [4]       |
|                 | Nordiazepam              | 1.5 – 2 mg/L       | 0.2-0.8 mg/L                                                    | [4]       |
|                 | Estazolam                |                    | 0.055-0.2                                                       | [4]       |
| Hypnotics       | Zolpidem                 | 0.5 mg/L           | 0.08 – 0.15 mg/L                                                | [4]       |
|                 | Zopiclone                | 0.15 mg/L          | 0.01 – 0.05 mg/L                                                | [4]       |
| Antidepressants | Fluoxetine               | 1-5.9 mg/L         |                                                                 | [4]       |
|                 | Norfluoxetine            | 1.0 – 5.6 mg/L     |                                                                 | [5]       |

|                              |                       |                   |                  |                                                       |
|------------------------------|-----------------------|-------------------|------------------|-------------------------------------------------------|
|                              | Sertraline            | 0.29 mg/L         |                  | [5]                                                   |
|                              | Venlafaxine           | 1-1.5 mg/L        |                  | [4]                                                   |
|                              | O-desmethylnelafaxine | 1 mg/L            |                  | [6]                                                   |
|                              | Citalopram            | 0.22 mg/L         |                  | [4]                                                   |
|                              | Mirtazipine           | 1 mg/L            |                  | [4]                                                   |
|                              | Amitriptyline         | 0.5-0.6 mg/L      |                  | [4]                                                   |
|                              | Nortriptyline         | 0.3-0.5 mg/L      |                  | [4]                                                   |
|                              | Paroxetine            | 0.35 – 0.4 mg/L   |                  | [4]                                                   |
|                              | Duloxetine            | 0.24 mg/L         |                  | [4]                                                   |
|                              | Dothiepin             | 0.3 – 0.8 mg/L    |                  | [4]                                                   |
|                              | Fluvoxamine           | 0.5 – 0.97 mg/L   |                  | [4]                                                   |
| Opioids                      | Codeine               | 0.5 - 1 mg/L      | 0.03-0.25        | [4, 7, 8]                                             |
|                              | Morphine              | 0.1 mg/L          | 0.01-0.1 mg/L    | [4]                                                   |
|                              | Propoxyphene          | 0.6-1 mg/L        | 0.05 – 0.3 mg/L  | [4]                                                   |
|                              | Methadone             | > 0.2 mg/L        | 0.25-0.35 mg/L   | [4, 9, 10]                                            |
|                              | Oxycodone             | 0.2 mg/L          | 0.005-0.1 mg/L   | [4]                                                   |
|                              | Fentanyl              | 0.003 – 0.3 mg/L  | 0.003 – 0.3 mg/L | [4]                                                   |
|                              | Tramadol              | > 1 mg/L          | 0.1-1 mg/L       | [4]                                                   |
| Analgesics/anti inflammatory | Paracetamol           | 100 – 150 mg/L    |                  | [11]                                                  |
|                              | O-desmethyl tramadol  | > 0.1 mg/L        |                  | [6, 12]                                               |
| Antipsychotic                | Pericyazine           | 0.1 mg/L          |                  | [13]                                                  |
|                              | Clozapine             | 0.6 – 1 mg/L mg/L | 0.1-0.6 mg/L     | [4]                                                   |
|                              | Olanzapine            | 0.15 – 0.2 mg/L   | 0.02-0.08 mg/L   | [4]                                                   |
|                              | Quetiapine            | 1-1.8 mg/L        |                  | [4]                                                   |
| Anti-convulsants             | Carbamazepine         | 10 mg/L           | 2 – 9 mg/L       | [4, 14]<br>> 8 mg/L causes poor cognitive performance |
|                              | Phenobarbitone        | 30 – 40 mg/L      |                  | [9]                                                   |

|              |                                          |                                |                                  |                                                                                                                                          |
|--------------|------------------------------------------|--------------------------------|----------------------------------|------------------------------------------------------------------------------------------------------------------------------------------|
|              | Valproic Acid                            | 150 - 200 mg/L                 |                                  | [4]                                                                                                                                      |
| Amphetamines | Methylamphetamine                        | > 0.15 mg/L                    | 0.1 mg/L                         | [4]                                                                                                                                      |
|              | 3,4-Methylenedioxymethamphetamine (MDMA) | 0.35-0.5 mg/L                  | 0.1-0.35 mg/L                    | [4]                                                                                                                                      |
|              | Dexamphetamine                           |                                | > 10 ng/L<br>> 0.01 mg/L         | [15]<br>Drug effects felt after plasma concentration > 10 ng/L                                                                           |
|              | Amphetamine                              | 0.2 mg/L                       | 7.5 ng/mL<br>0.01 mg/L           | [4, 16]<br>Amphetamine group showed intoxication greater than control for more than 7 hours after administration, approximately 45 ng/mL |
|              | Methylphenidate                          | 0.1-0.5                        |                                  | [4]                                                                                                                                      |
| Other        | Amlodipine                               | 0.088 mg/L                     |                                  | [4]                                                                                                                                      |
|              | Irbesartan                               | > 5.3 mg/L (therapeutic conc.) |                                  | [12]                                                                                                                                     |
|              | Flecainide                               | 1-2                            |                                  | [4]                                                                                                                                      |
| Cocaine      | Cocaine                                  | 0.25-1 mg/L                    | 50 ng/mL<br>50 ug/L<br>0.05 mg/L | [4, 17]<br>Euphoric/behavioral/physiological effects returned to baseline 60 min after administration, approx. 50 ng/mL)                 |
|              | Benzoyllecgonine                         |                                | 0.1 mg/L                         | [4]                                                                                                                                      |

## SUPPLEMENTARY TABLE REFERENCES

- 1 Skopp G, Pötsch L. Cannabinoid concentrations in spot serum samples 24–48 hours after discontinuation of cannabis smoking. *J Anal Toxicol* 2008;**32**:160-4.
- 2 Longo MC, Hunter CE, Lokan RJ, *et al.* The prevalence of alcohol, cannabinoids, benzodiazepines and stimulants amongst injured drivers and their role in driver culpability: part ii: the relationship between drug prevalence and drug concentration, and driver culpability. *Accid Anal Prev* 2000;**32**:623-32.
- 3 Smink BE, Lusthof KJ, De Gier JJ, *et al.* The relation between the blood benzodiazepine concentration and performance in suspected impaired drivers. *Journal of forensic and legal medicine* 2008;**15**:483-8.
- 4 Schulz M, Iwersen-Bergmann S, Andresen H, *et al.* Therapeutic and toxic blood concentrations of nearly 1,000 drugs and other xenobiotics. *Critical care* 2012;**16**:1-4.
- 5 Baselt RC. *Disposition of toxic drugs and chemicals in man, 11th Edition*: Chemical Toxicology Institute 2017.
- 6 Baselt RC. *Disposition of toxic drugs and chemicals in man, 8th Edition*: Chemical Toxicology Institute 2008.
- 7 Chen A, Ashburn MA. Cardiac effects of opioid therapy. *Pain Med* 2015;**16**:S27-S31.
- 8 Gilljam T, Eriksson B, Sixt R. Cardiac output and pulmonary gas exchange at maximal exercise after atrial redirection for complete transposition. *European heart journal* 1998;**19**:1856-64.
- 9 Baselt RC. *Disposition of toxic drugs and chemicals in man, 9th Edition*: Chemical Toxicology Institute 2011.
- 10 Dyer KR, White JM, Foster DJ, *et al.* The relationship between mood state and plasma methadone concentration in maintenance patients. *Journal of clinical psychopharmacology* 2001;**21**:78-84.
- 11 Hansson RC. Paracetamol Detections in WA Coronial Casework. Forensic Science Laboratory Chemistry Centre (WA), July 1992 to March 2007.
- 12 Moffat AC, Osselton MD, Widdop B, *et al.* *Clarke's analysis of drugs and poisons*: Pharmaceutical press London 2011.
- 13 Regenthal R, Krueger M, Koeppe C, *et al.* Drug levels: therapeutic and toxic serum/plasma concentrations of common drugs. *Journal of clinical monitoring and computing* 1999;**15**:529-44.
- 14 O'Dougherty M, Wright FS, Cox S, *et al.* Carbamazepine plasma concentration: relationship to cognitive impairment. *Arch Neurol* 1987;**44**:863-7.
- 15 Brauer LH, Ambre J, de Wit H. Acute tolerance to subjective but not cardiovascular effects of d-amphetamine in normal, healthy men. *Journal of clinical psychopharmacology* 1996;**16**:72-6.
- 16 Mendelson J, Jones RT, Upton R, *et al.* Methamphetamine and ethanol interactions in humans. *Clinical Pharmacology & Therapeutics* 1995;**57**:559-68.
- 17 Cone EJ, Kumor K, Thompson LK, *et al.* Correlation of saliva cocaine levels with plasma levels and with pharmacologic effects after intravenous cocaine administration in human subjects. *J Anal Toxicol* 1988;**12**:200-6.
